# Supplementary material for: Phylotranscriptomic analysis uncovers a wealth of tissue inhibitor of metalloproteinases variants in echinoderms
Source: R Soc Open Sci. 2015 Dec 4;2(12):150377. doi: 10.1098/rsos.150377 (PMC4807446; doi:10.1098/rsos.150377)
Supplement: Fig.S3.pdf: This is the most likely tree found using coding sequences, the alignment of which resulted from our initial alignment-and-culling procedure. [file rsos150377supp3.pdf]

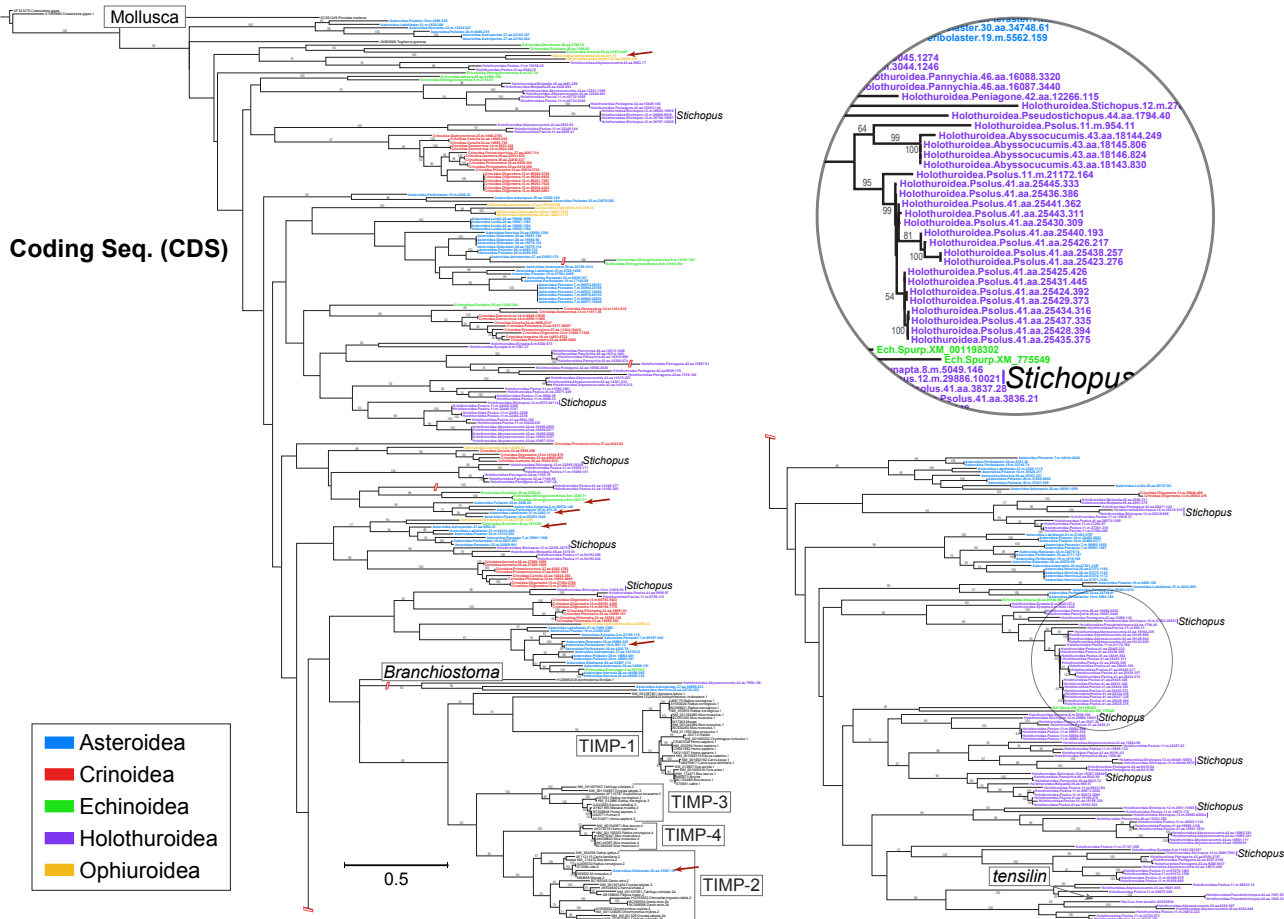

Figure S3. The most likely phylogeny of the TIMP gene family found searching coding sequences under rapid bootstrapping in RAxML. Terminals of interest (molluscan outgroups, the cephalochordate *B. floridae*, vertebrate terminals identified as TIMPs 1–4, and the previously identified echinoderm TIMP tensilin) are noted, and the diversity of TIMPs used by the holothuroid *Stichopus* is highlighted. Red arrows denote terminals with a read depth of less than 20. Magnified area shows one recent diversification of holothuroid sequences, this in *Psolus*.
