# Supplementary material for: Phylotranscriptomic analysis uncovers a wealth of tissue inhibitor of metalloproteinases variants in echinoderms
Source: PubMed Central journal article supplement (PMC4807446; doi:10.1098/rsos.150377), 2015-12-04
Supplement: rsos150377supp2.pdf [file rsos150377supp2.pdf]

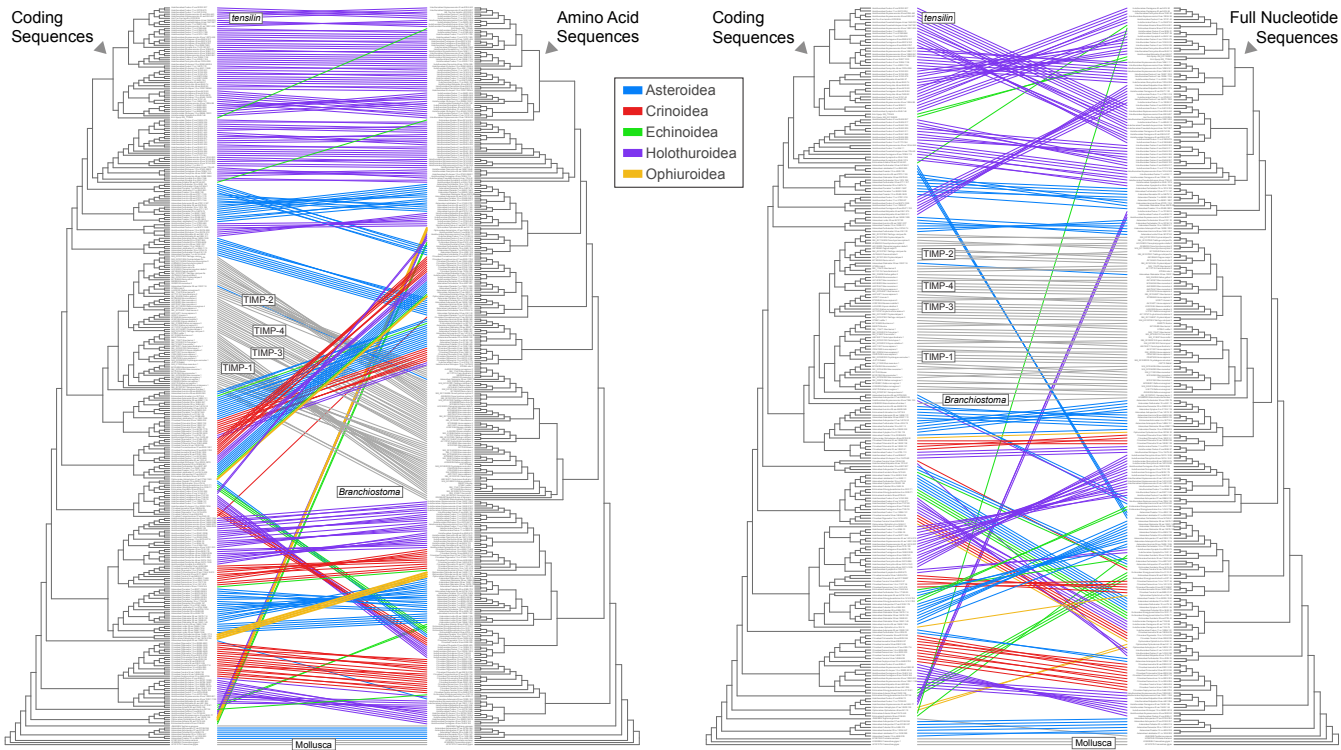

Figure S2. Comparison of common terminals in best trees recovered using different sequence types after alignment and culling. The tree from coding sequences is shown on the left in each comparison, and only terminals shared in both trees are compared.
